# Supplementary material for: PEARL: A Non-interventional Study of Real-World Alirocumab Use in German Clinical Practice
Source: PubMed Central journal article supplement — Drugs Real World Outcomes. 2019 Jul 6;6(3):115–23. doi: 10.1007/s40801-019-0158-0 (PMC6702526; doi:10.1007/s40801-019-0158-0), 2019-07-06
Supplement: 40801_2019_158_MOESM1_ESM.pdf [file 40801_2019_158_MOESM1_ESM.pdf]

# **PEARL: A Non-Interventional Study of Real-World Alirocumab Use in German Clinical Practice**

**Prof Dr Klaus G. Parhofer<sup>1</sup>, Dr Berndt von Stritzky<sup>2</sup>, Dr Nicole Pietschmann<sup>2</sup>, Dr  
Cornelia Dorn<sup>2</sup>, Dr W. Dieter Paar<sup>2</sup>**

*<sup>1</sup>Medical Department IV - Grosshadern, University of Munich, Munich, Germany;*

*<sup>2</sup>Medical Department, Sanofi-Aventis Deutschland GmbH, Berlin, Germany*

## Supplementary Material

### Methods

Familial hypercholesterolemia was defined as follows in paper-based case report form: a. presence of FH (yes, no, unknown); b. patient with LDL-C value >4.9 mmol/L (190 mg/dL; yes, no); c. first degree family member with LDL-C value >4.9 mmol/L (190 mg/dL; yes, no, unknown); d. first degree family member with premature coronary heart disease (yes, no, unknown); e. first degree family member with xanthomas (yes, no, unknown); f. patient with pre-existing tendinous xanthomas (yes, no); g. patient with pre-existing arcus corneae (yes, no).

For this study, the FH criterion was defined as FH, no FH and unknown FH by combining the direct evaluation by item a. and the following algorithm based on previously described FH criteria [1] using items b. to g.:

- If yes was ticked for item a., then the overall FH criterion was FH
- else, if no was ticked for item b., then the overall FH criterion was no FH,
- else, if yes was ticked for item b. and at the same time at least one yes was ticked for items c. to g., the overall FH criterion was FH,
- else, if yes was ticked for item b. and at the same time no is ticked for all items (c. to g) then the overall FH criterion is no FH
- else, the overall FH criterion is set to unknown FH.

Only the composite FH criterion was analysed, not the single items a. to g.

## References

1. Klose G, Laufs U, Marz W, Windler E. Familial hypercholesterolemia: developments in diagnosis and treatment. Deutsches Arzteblatt international. 2014;111(31-32):523-9.

## Supplementary Table 1 Inclusion and exclusion criteria

---

### Inclusion criteria

---

1. Treatment with alirocumab due to hypercholesterolemia according to SmPC
  2. Informed consent was provided in form of written authorization (signature)
  3. Patient aged  $\geq 18$  years
- 

### Exclusion criteria

---

1. Participation in alirocumab study ODYSSEY APPRISE (NCT02476006)
  2. Contraindication to alirocumab according to SmPC
- 

SmPC, summary of product characteristics.

**Supplementary Table 2** Number of statins<sup>a</sup> according to statin intolerance status prior to start of alirocumab therapy (ITT analysis)

| <i>n</i> (%)      | Total statin intolerance | Partial statin intolerance | No statin intolerance |
|-------------------|--------------------------|----------------------------|-----------------------|
| Number of statins |                          |                            |                       |
| 0                 | 146 (52.7)               | 14 (9.0)                   | 10 (6.4)              |
| 1                 | 66 (23.8)                | 131 (84.5)                 | 140 (89.2)            |
| 2                 | 26 (9.4)                 | 7 (4.5)                    | 6 (3.8)               |
| 3                 | 21 (7.6)                 | 2 (1.3)                    | 1 (0.6)               |
| 4                 | 8 (2.9)                  | 0                          | 0                     |
| 5                 | 5 (1.8)                  | 0                          | 0                     |
| 6                 | 5 (1.8)                  | 1 (0.6)                    | 0                     |
| Total             | 277 (100)                | 155 (100)                  | 157 (100)             |

<sup>a</sup>Entries were limited by data reported by physician; multiple entries were possible. Considered statins included atorvastatin, fluvastatin, lovastatin, pravastatin, rosuvastatin, and simvastatin.

ITT, intention-to-treat.

**Supplementary Table 3** Initial alirocumab dosing regimen at the start of therapy in PEARL and according to patient subgroups

| <i>n</i> (%)                | Alirocumab 75 mg<br>Q2W | Alirocumab 150 mg<br>Q2W | Unknown dosing<br>regimen |
|-----------------------------|-------------------------|--------------------------|---------------------------|
| Overall ( <i>n</i> =612)    | 446 (72.9)              | 150 (24.5)               | 16 (2.6)                  |
| <b>Patient subgroups</b>    |                         |                          |                           |
| FH status ( <i>n</i> =612)  |                         |                          |                           |
| FH                          | 227 (37.1)              | 75 (12.3)                | 9 (1.5)                   |
| Non-FH                      | 23 (3.8)                | 11 (1.8)                 | 0                         |
| Unknown FH<br>status        | 196 (32.0)              | 64 (10.5)                | 7 (1.1)                   |
| DM status ( <i>n</i> =602)  |                         |                          |                           |
| Type 1 DM                   | 9 (1.5)                 | 1 (0.2)                  | 0                         |
| Type 2 DM                   | 113 (18.8)              | 37 (6.1)                 | 4 (0.7)                   |
| Non-DM                      | 319 (53.0)              | 109 (18.1)               | 10 (1.7)                  |
| CHD status ( <i>n</i> =529) |                         |                          |                           |
| CHD                         | 320 (60.5)              | 112 (21.2)               | 11 (2.1)                  |
| Non-CHD                     | 73 (13.8)               | 11 (2.1)                 | 2 (0.4)                   |
| ACS status ( <i>n</i> =425) |                         |                          |                           |
| Post-ACS                    | 150 (35.3)              | 48 (11.3)                | 4 (0.9)                   |
| No ACS                      | 175 (41.2)              | 52 (12.2)                | ≤12 (≤2.8)                |
| Gender ( <i>n</i> =608)     |                         |                          |                           |
| Male                        | 278 (45.7)              | 108 (17.8)               | 8 (1.3)                   |
| Female                      | 164 (59.0)              | 42 (15.1)                | 8 (2.9)                   |

ACS, acute coronary syndrome; CHD, coronary heart disease; DM, diabetes mellitus; FH, familial hypercholesterolemia; Q2W, every 2 weeks.

**Supplementary Table 4** Alirocumab treatment status at Weeks 0, 12, and 24

(ITT analysis)

| <i>n</i> (%)                                                   | Alirocumab ( <i>n</i> =612) |
|----------------------------------------------------------------|-----------------------------|
| Alirocumab 75 mg Q2W at Week 0 (starting dose)                 |                             |
| 75 mg Q2W (no change in dosing regimen) at Weeks 12 and 24     | 245 (40.0)                  |
| 150 mg Q2W at Weeks 12 and 24                                  | 145 (23.7)                  |
| 150 mg Q2W at Week 12 and 75 mg Q2W at Week 24                 | 1 (0.2)                     |
| 150 mg Q2W at Week 12 and treatment discontinuation at Week 24 | 12 (2.0)                    |
| Treatment discontinuation at Weeks 12 and 24                   | 48 (7.8)                    |
| Treatment discontinuation at Week 12 and 150 mg Q2W at Week 24 | 1 (0.2)                     |
| Alirocumab 150 mg Q2W at Week 0 (starting dose)                |                             |
| 150 mg Q2W (no change in dosing regimen) at Weeks 12 and 24    | 128 (20.9)                  |
| Treatment discontinuation at Weeks 12 and 24                   | 16 (2.6)                    |
| 75 mg Q2W at Weeks 12 and 24                                   | 11 (1.8)                    |
| 75 mg Q2W at Week 12 and 150 mg Q2W at Week 24                 | 1 (0.2)                     |
| 75 mg Q2W at Week 12 and treatment discontinuation at Week 24  | 2 (0.3)                     |
| Missing (no dosage provided)                                   | 2 (0.3)                     |

ITT, intention-to-treat; Q2W, every 2 weeks.

**Supplementary Table 5** Alirocumab efficacy on LDL-C levels for the PEARL study participants and according to patient subgroups (mITT analysis)

|                                         | <i>n</i> | Baseline, mean (SD), mmol/L [mg/dL] | Week 24, mean (SD), mmol/L [mg/dL] | Change from baseline to Week 24, LS mean, % | <i>p</i> -value      |
|-----------------------------------------|----------|-------------------------------------|------------------------------------|---------------------------------------------|----------------------|
| Total PEARL                             | 491      | 4.7 (1.6)<br>[180.5 (60.1)]         | 2.3 (1.2)<br>[90.2 (46.0)]         | -48.6                                       | <0.0001              |
| FH                                      | 244      | 5.0 (1.7)<br>[194.9 (67.0)]         | 2.5 (1.4)<br>[97.5 (54.1)]         | -49.1                                       |                      |
| Non-FH                                  | 28       | 4.3 (1.0)<br>[164.6 (39.6)]         | 2.1 (0.9)<br>[79.3 (33.2)]         | -51.4                                       | 0.6500 <sup>a</sup>  |
| Unknown FH status                       | 219      | 4.3 (1.3)<br>[166.5 (49.5)]         | 2.2 (0.9)<br>[83.4 (35.1)]         | -47.7                                       |                      |
| Type 1 DM                               | 7        | 3.7 (1.0)<br>[144.7 (37.1)]         | 1.9 (0.5)<br>[73.9 (19.2)]         | -48.4                                       |                      |
| Type 2 DM                               | 126      | 4.6 (1.7)<br>[177.6 (64.1)]         | 2.3 (1.1)<br>[88.1 (42.8)]         | -47.4                                       | 0.7930 <sup>a</sup>  |
| Non-DM                                  | 352      | 4.7 (1.5)<br>[183.3 (58.7)]         | 2.4 (1.2)<br>[91.8 (47.5)]         | -49.0                                       |                      |
| CHD                                     | 378      | 4.5 (1.5)<br>[174.6 (58.2)]         | 2.2 (1.0)<br>[83.9 (40.2)]         | -50.0                                       |                      |
| Non-CHD                                 | 66       | 5.0 (1.4)<br>[192.8 (53.3)]         | 2.6 (1.1)<br>[101.6 (44.4)]        | -45.6                                       | 0.1542 <sup>a</sup>  |
| Post-ACS                                | 180      | 4.3 (1.3)<br>[167.8 (50.5)]         | 2.1 (1.0)<br>[80.8 (39.5)]         | -50.4                                       |                      |
| No ACS                                  | 187      | 4.9 (1.5)<br>[188.1 (58.4)]         | 2.4 (1.1)<br>[91.4 (42.7)]         | -49.8                                       | 0.7891 <sup>a</sup>  |
| Male                                    | 323      | 4.5 (1.5)<br>[172.4 (57.7)]         | 2.2 (1.2)<br>[84.7 (44.6)]         | -49.2                                       |                      |
| Female                                  | 166      | 5.1 (1.6)<br>[197.0 (61.6)]         | 2.6 (1.2)<br>[101.4 (46.7)]        | -47.2                                       | 0.3595 <sup>a</sup>  |
| Baseline LDL-C <3.4 mmol/L (<130 mg/dL) | 92       | 2.7 (0.5)<br>[104.4 (19.6)]         | 1.7 (0.9)<br>[64.2 (35.1)]         | -38.1                                       | <0.0001 <sup>a</sup> |
| Baseline LDL-C ≥3.4 to 4.9 mmol/L       | 205      | 4.2 (0.4)<br>[161.8 (17.1)]         | 2.1 (0.8)<br>[80.3 (31.1)]         | -50.1                                       |                      |



(≥130 to  
≤190  
mg/dL)

|                                                     |     |                             |                             |       |
|-----------------------------------------------------|-----|-----------------------------|-----------------------------|-------|
| Baseline<br>LDL-C >4.9<br>mmol/L<br>(>190<br>mg/dL) | 194 | 6.1 (1.3)<br>[236.5 (48.9)] | 2.9 (1.4)<br>[113.0 (53.0)] | -52.0 |
|-----------------------------------------------------|-----|-----------------------------|-----------------------------|-------|

---

|                             |     |                             |                            |       |
|-----------------------------|-----|-----------------------------|----------------------------|-------|
| Total statin<br>intolerance | 220 | 5.0 (1.5)<br>[194.7 (59.3)] | 2.6 (1.2)<br>[99.5 (44.9)] | -47.6 |
|-----------------------------|-----|-----------------------------|----------------------------|-------|

|                                  |     |                             |                            |       |                     |
|----------------------------------|-----|-----------------------------|----------------------------|-------|---------------------|
| Partial<br>statin<br>intolerance | 127 | 4.3 (1.4)<br>[166.6 (55.5)] | 2.0 (1.0)<br>[78.3 (38.0)] | -52.2 | 0.1302 <sup>a</sup> |
|----------------------------------|-----|-----------------------------|----------------------------|-------|---------------------|

|                          |     |                             |                            |       |
|--------------------------|-----|-----------------------------|----------------------------|-------|
| No statin<br>intolerance | 128 | 4.4 (1.6)<br>[170.3 (61.2)] | 2.2 (1.3)<br>[85.5 (50.8)] | -47.1 |
|--------------------------|-----|-----------------------------|----------------------------|-------|

---

<sup>a</sup>Interaction *p*-value

ACS, acute coronary syndrome; CHD, coronary heart disease; DM, diabetes mellitus; FH, familial hypercholesterolemia; mITT, modified intention-to-treat; LDL-C, low-density lipoprotein cholesterol; LS, least squares; SD, standard deviation.

## Supplementary Figure 1. Patient disposition.

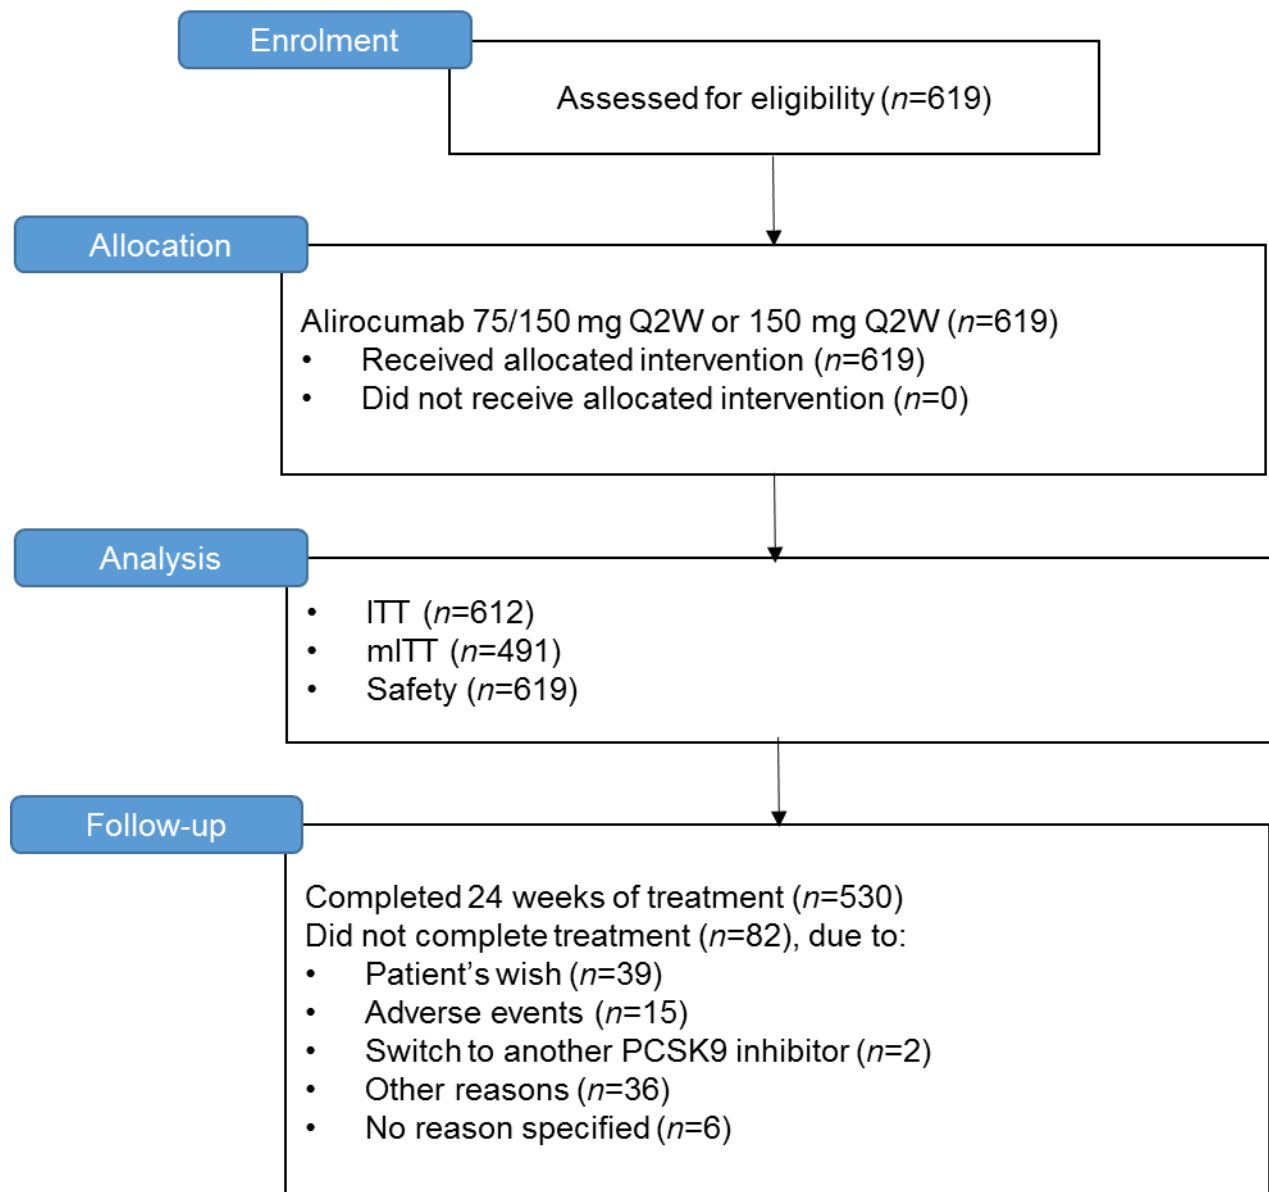

For treatment discontinuation, multiple entries were possible. Treatment discontinuation reasons were presented according to a prespecified list: Patient's wish, AEs, switch to another PCSK9 inhibitor, and other reasons.

AE, adverse event; ITT, intention-to-treat; mITT, modified intention-to-treat; PCSK9, proprotein convertase subtilisin/kexin type 9; Q2W, every 2 weeks.
